# Supplementary material for: Hawksbill × loggerhead sea turtle hybrids at Bahia, Brazil: where do their offspring go?
Source: PeerJ. 2014 Feb 13;2:e255. doi: 10.7717/peerj.255 (PMC3932845; doi:10.7717/peerj.255)
Supplement: Supplemental Information 1 — Haplotype sequences are shown in the second sheet. [file peerj-02-255-s001.xlsx]

## Sheet: Haplotype frequencies
Haplotype frequencies
Haplotypes	ASPSP	Ceará coast	Bahia Coast	Abrolhos	Arvoredo	Cassino	Total
A01/A	7	20	24	58	3	14	126
A09/F	0	0	2	1	0		3
A11/F	0	1	0	0	0		1
A23/Q	1	0	0	0	0		1
A24/Q	0	0	0	1	0		1
A32/none	0	0	3	2	0		5
A62/none	3	1	2	3	3	2	14
A76/none	0	0	1	0	0		1
A92/none	1	0	0	0	0		1
EixCc BR3	0	1	0	0	0	3	4
N hap	4	4	5	5	2	2	-
Total	12	23	32	65	6	19	157

## Sheet: Haplotypes
>EIA01
NNNNNNNNNNNNNNNNNNNNNNNNNNNNNNNNNNNNNACGCAGAAT-AAGCGCCAACACA
TAAACTTACCTATATCCTCTACCGTGCCCAGCAGACCAATATCCGCAACACTTACCTATG
TACTATTGTACATCTACTTATTTACCACTAGCATATGACCAGTAGTACTGCTGATTAATC
TGACCTAAAACATAAAA--TTATTGGTTTTACATAAACTGTTTAAACTACATGACTATTA
TACAGGTAATAAGAATGAAATGGTATAGGACATAATATTAAGTAATTATTCTCAAACATG
AATATCGTCACAGTAATGGGTTATTTCTTAGTTCAGCTCATCACGAGAAATAAGCAATCC
TTGTTAGTAAGATACAACATTACCAGTTTCAGGCCCATTAATTTATGGCGTACATAACTG
ATCTATTCTGGCCTCTGGTTGTTTTTTCAGGCACATTGAATTGGTAAAGTTCATTCATCT
CTTTTTAAGAGG-------CCTCTGGTTAAATGAGTTCTATACATTAAATTTATAACCTG
GCATAAGGTGGTTTTACTTGCATATAGTAGTCTTTTTTTTCTCTTTGTGTTCTCAGGCCC
ACATAACTGATACCTGCCGAATTAATGAAACTGAACCTACGTTTAAGATGATTGGTCGTG
CAAGATAATCAATGGTATTATTTAATTAATGCTTGGAAGACATATATTCTTATAAAAACT
CACAACAGTTATTTACAAGCCTAA-CCTATTACAACTATACTTTTTAGTTAAACCCCCCC
--------------------------
>EIA28
CCCCAAAACCGGAATCTTTTAATTAAACTATCCCTTGACGCAGAAT-AAGCGCCAACACA
TAAACTTACCTATATCCTCTACCGTGCCCAGCAGACCAATATCCGCAACACTTACCTATG
TACTATTGTACATCTACTTATTTACCACTAGCATATGACCAGTAGTACTGCTGATTAATC
TGACCTAAAACATAAAA--TTATTGGTTTTACATAAACTGTTTAAACTACATGACTATTA
TACAGGTAATAAGAATGAAATGGTATAGGACATAATATTAAGTAATTATTCTCAAACATG
AATATCGTCACGGTAATGGGTTATTTCTTAGTTCAGCTCATCACGAGAAATAAGCAATCC
TTGTTAGTAAGATACAACATTACCAGTTTCAGGCCCATTAATTTATGGCGTACATAACTG
ATCTATTCTGGCCTCTGGTTGTTTTTTCAGGCACATTGAATTGGTAAAGTTCATTCATCT
CTTTTTAAGAGG-------CCTCTGGTTAAATGAGTTCTATACATTAAATTTATAACCTG
GCATAAGGTGGTTTTACTTGCATATAGTAGTCTTTTTTTTCTCTTTGTGTTCTCAGGCCC
ACATAACTGATACCTGCCGAATTAATGAAACTGAACCTACGTTTAAGATGATTGGTCGTG
CAAGATAATCAATGGTATTATTTAATTAATGCTTGGAAGACATATATTCTTATAAAAACT
CACAACAGTTATTTACAAGCCTAA-CCTATTACAACTATACTTTTTAGTTAAACCCCCCC
--------------------------
>EIA62
NNNNNNNNNNNNNNNNNNNNNNNNNNNNNNNNNNNNNACGCAGAAT-AAGCGCCAACACA
TAAACTTACCTATATCCTCTACCGTGCCCAGCAGACCAATATCCGCAACACTTACCTATG
TACTATTGTACATCTACTTATTTACCACTAGCATATGACCAGTAGTACTGCTGATTAATC
TGACCTAAAACATAAAA--TTATTGGTTTTACATAAACTGTTTAAACTACATGACTATTA
TACAGGTAATAAGAATGAAATGGTATAGGACATAATATTAAGTAATTATTCTCAAACATG
AATATCGTCACAGTAATGGGTTATTTCTTAGTTCAGCTCATCACGAGAAATAAGCAATCC
TTGTTAGTAAGATACAACATTACCAGTTTCAGGCCCATTGATTTATGGCGTACATAACTG
ATCTATTCTGGCCTCTGGTTGTTTTTTCAGGCACATTGAATTGGTAAAGTTCATTCATCT
CTTTTTAAGAGG-------CCTCTGGTTAAATGAGTTCTATACATTAAATTTATAACCTG
GCATAAGGTGGTTTTACTTGCATATAGTAGTCTTTTTTTTCTCTTTGTGTTCTCAGGCCC
ACATAACTGATACCTGCCGAATTAATGAAACTGAACCTACGTTTAAGATGATTGGTCGTG
CAAGATAATCAATGGTATTATTTAATTAATGCTTGGAAGACATATATTCTTATAAAAACT
CACAACAGTTATTTACAAGCCTAA-CCTATTACAACTATACTTTTTAGTTAAACCCCCCC
--------------------------
>EIA92
NNNNNNNNNNNNNNNNNNNNNNNNNNNNNNNNNNNNNACGCAGAAT-AAGCGCCAACACA
TAAACTTACCTATATCCTCTACCGTGCCCAGCAGACCAATATCCGCAACACTTACCTATG
TACTATTGTACATCTACTTATTTACCACTAGCATATGACCAGTAGTACTGCTGATTAATC
TGACCTAAAACATAGAA--TTATTGGTTTTACATAAACTGTTTAAACTACATGACTATTA
TACAGGTAATAAGAATGAAATGGTATAGGACATAATATTAAGTAATTATTCTCAAACATG
AATATCGTCACAGTAATGGGTTATTTCTTAGTTCAGCTCATCACGAGAAATAAGCAACCC
TTGTTAGTAAGATACAACATTACCAGTTTCAGGCCCATTAATTTATGGCGTACATAACTG
ATCTATTCTGGCCTCTGGTTGTTTTTTCAGGCACATTGAATTGGTAAAGTTCATTCATCT
CTTTTTAAGAGG-------CCTCTGGTTAAATGAGTTCTATACATTAAATTTATAACCTG
GCATAAGGTGGTTTTACTTGCATATAGTAGTCTTTTTTTTCTCTTTGTGTTCTCAGGCCC
ACATAACTGATACCTGCCGAATTAATGAAACTGAACCTACGTTTAAGATGATTGGTCGTG
CAAGATAATCAATGGTATTATTTAATTAATGCTTGGAAGACATATATTCTTATAAAAACT
CACAACAGTTATTTACAAGCCTAA-CCTATTACAACTATACTTTTTAGTTAAACCCCCCC
--------------------------
>EIA11
NNNNNNNNNNNNNNNNNNNNNNTTAAACTATCCCTTGACGCAGAAT-AAGCGCCAACACA
TAAACTTACCTATATCCTCTACCGTGCCCAGCAGACCAATATCCGCAACACTTACCTATG
TATTATTGTACATCTACTTATTTACCGCTAGCATATGACCGGTAGTACTGCTGATTAATC
TGACCTAAAACATAAAA--TTATTGGTTTCACATAAACTGTTTAAACTACATGACTATTA
TACGGGTAATAAGAATGAAATGGTATAGGACATAATATTAAGTAATTATTCTCAAACATG
AATATTGTCACAGTAATGGGTTATTTCTTAGTTCAGCTCATCACGAGAAATAAGCAACCC
TTGTTAGTAAGATACAACATTACCAGTTTCAGGCCCATTAATTTATGGCGTACATAACTG
ATCTATTCTGGCCTCTGGTTGTTTTTTCAGGCACATCGAATTGGTAAAGTTCATTCATCT
CTTTTTAAAAGG-------CCTCTGGTTAAATGAGTTCTATACATTAAATTTATAACCTG
GCATAACGTGGTTTTACTTGCATATAGTAGTCTTTTTTTTCTCTTTGTGTTCTCAGGCCC
ACATAACTGATACCTGCCGAATCAATGAAACTGAACCTACGTTTAAGATGATTGGTCGTG
CAAGATAATCAATGGTATTATTTAATTAATGCTTGGAAGACATATATTCTTATAAAAACT
CACAACAGTTATTTACAAGCCTAA-CCTATTACAACTATACTTTTTAGTTAAACCCCCCC
--------------------------
>EIA24
NNNNNNNNNNNNNNNNNNNNNNNNNNNNNNNNNNNNNACGCAGAAT-AAGCGCCAACACA
TAAACTTACCTATATCCTCTACCGTGCCCAGCAGACCAATATCCGCAACACTTACCTATG
TATTATTGTACATCTACTTATTTACCGCTAGCATATGACCGGTAGTACTGCTGATTAATC
TGACCTAAAACATAAAA--TTATTGGTTTCACATAAACTGTTTAAACTACATGACTATTA
TACAGGTAATAAGAATGAAATGGTATAGGACATAATATTAAGTAATTATTCTCAAACATG
AATATTGTCACAGTAATGGGTTATTTCTTAGTTCAGCTCATCACGAGAAATAAGCAACCC
TTGTTAGTAAGATACAACATTACCAGTTTCAGGCCCATTAATTTATGGCGTACATAACTG
ATCTATTCTGGCCTCTGGTTGTTTTTTCAGGCACATCGAATTGGTAAAGTTCATTCATCT
CTTTTTAAAAGG-------CCTCTGGTTAAATGAGTTCTATACATTAAATTTATAACCTG
GCATAAGGTGGTTTTACTTGCATATAGTAGTCTTTTTTTTCTCTTTGTGTTCTCAGGCCC
ACATAACTGATACCTGCCGAATTAATGAAACTGAACCTACGTTTAAGATGATTGGTCGTG
CAAGATAATCAATGGTATTATTTAATTAATGCTTGAAAGACATATATTCTTATAAAAACT
CACAACAGTTATTTACAAGCCTAA-CCTATTACAACTATACTTTTTAGTTAAACCCCCCC
--------------------------
>EIA23
NNNNNNNNNNNNNNNNNNNNNNNNNNNNNNNNNNNNNACGCAGAAT-AAGCGCCAACACA
TAAACTTACCTATATCCTCTACCGTGCCCAGCAGACCAATATCCGCAACACTTACCTATG
TATTATTGTACATCTACTTATTTACCACTAGCATATGACCGGTAGTACTGCTGATTAATC
TGACCTAAAACATAAAA--TTATTGGTTTCACATAAACTGTTTAAACTACATGACTATTA
TACAGGTAATAAGAATGAAATGGTATAGGACATAATATTAAGTAATTATTCTCAAACATG
AATATTGTCACAGTAATGGGTTATTTCTTAGTTCAGCTCATCACGAGAAATAAGCAACCC
TTGTTAGTAAGATACAACATTACCAGTTTCAGGCCCATTAATTTATGGCGTACATAACTG
ATCTATTCTGGCCTCTGGTTGTTTTTTCAGGCACATCGAATTGGTAAAGTTCATTCATCT
CTTTTTAAAAGG-------CCTCTGGTTAAATGAGTTCTATACATTAAATTTATAACCTG
GCATAAGGTGGTTTTACTTGCATATAGTAGTCTTTTTTTTCTCTTTGTGTTCTCAGGCCC
ACATAACTGATACCTGCCGAATTAATGAAACTGAACCTACGTTTAAGATGATTGGTCGTG
CAAGATAATCAATGGTATTATTTAATTAATGCTTGGAAGACATATATTCTTATAAAAACT
CACAACAGTTATTTACAAGCCTAA-CCTATTACAACTATACTTTTTAGTTAAACCCCCCC
--------------------------
>EIA09
NNNNNNNNNNNNNNNNNNNNNNNNNNNNNNNNNNNNNACGCAGAAT-AAGCGCCAACACA
TAAACTTACCTATATCCTCTACCGTGCCCAGCAGACCAATATCCGCAACACTTACCTATG
TATTATTGTACATCTACTTATTTACCACTAGCATATGACCGGTAGTACTGCTGATTAATC
TGACCTAAAACATAAAA--TTATTGGTTTCACATAAACTGTTTAAACTACATGACTATTA
TACGGGTAATAAGAATGAAATGGTATAGGACATAATATTAAGTAATTATTCTCAAACATG
AATATTGTCACAGTAATGGGTTATTTCTTAGTTCAGCTCATCACGAGAAATAAGCAACCC
TTGTTAGTAAGATACAACATTACCAGTTTCAGGCCCATTAATTTATGGCGTACATAACTG
ATCTATTCTGGCCTCTGGTTGTTTTTTCAGGCACATCGAATTGGTAAAGTTCATTCATCT
CTTTTTAAAAGG-------CCTCTGGTTAAATGAGTTCTATACATTAAATTTATAACCTG
GCATAACGTGGTTTTACTTGCATATAGTAGTCTTTTTTTTCTCTTTGTGTTCTCAGGCCC
ACATAACTGATACCTGCCGAATCAATGAAACTGAACCTACGTTTAAGATGATTGGTCGTG
CAAGATAATCAATGGTATTATTTAATTAATGCTTGGAAGACATATATTCTTATAAAAACT
CACAACAGTTATTTACAAGCCTAA-CCTATTACAACTATACTTTTTAGTTAAACCCCCCC
--------------------------
>EIA32
CCCCAAAACCGGAATCTTTTAATTAAACTATCCCTTGACGCAGAAT-AAGCGCCAACACA
TAAACTTACCTATATCCTCTACCGTGCCCAGCAGACCAATATCCGCAACACTTACCTATG
TACTATTGTACATCTACTTATTTACCACTAGCATATGACCAGTAGTACTGCTGATTAATC
TGACCTAAAACATAGAA--TTATTGGTTTTACATAAACTGTTTAAACTACATGACTATTA
TACAGGTAATAAGAATGAAATGGTATAGGACATAATATTAAGTAATTATTCTCAAACATG
AATATCGTCACAGTAATGGGTTATTTCTTAGTTCAGCTCATCACGAGAAATAAGCAATCC
TTGTTAGTAAGATACAACATTACCAGTTTCAGGCCCATTAATTTATGGCGTACATAACTG
ATCTATTCTGGCCTCTGGTTGTTTTTTCAGGCACATTGAATTGGTAAAGTTCATTCATCT
CTTTTTAAGAGG-------CCTCTGGTTAAATGAGTTCTATACATTAAATTTATAACCTG
GCATAAGGTGGTTTTACTTGCATATAGTAGTCTTTTTTTTCTCTTTGTGTTCTCAGGCCC
ACATAACTGATACCTGCCGAATTAATGAAACTGAACCTACGTTTAAGATGATTGGTCGTG
CAAGATAATCAATGGTATTATTTAATTAATGCTTGGAAGACATATATTCTTATAAAAACT
CACAACAGTTATTTACAAGCCTAA-CCTATTACAACTATACTTTTTAGTTAAACCCCCCC
--------------------------
>EIA76
NNNNNNNNNNNNNNNNNNNNNNNNNNNNNNNNNNNNNACGCAGAAT-AAGCGCCAACACA
TAAACTTACCTATATCCTCTACCGTGCCCAGCAGACCAATATCCGCAACACTTACCTATG
TATTATTGTACATCTACTTATTTACCACTAGCATATGACCAGTAGTACTGCTGATTAATC
TGACCTAAAACATAGAA--TTATTGGTTTTACATAAACTGTTTAAACTACATGACTATTA
TACAGGTAATAAGAATGAAATGGTATAGGACATAATATTAAGTAATTATTCTCAAACATG
AATATCGTCACAGTAATGGGTTATTTCTTAGTTCAGCTCATCACGAGAAATAAGCAATCC
TTGTTAGTAAGATACAACATTACCAGTTTCAGGCCCATTAATTTATGGCGTACATAACTG
ATCTATTCTGGCCTCTGGTTGTTTTTTCAGGCACATTGAATTGGTAAAGTTCATTCATCT
CTTTTTAAGAGG-------CCTCTGGTTAAATGAGTTCTATACATTAAATTTATAACCTG
GCATAAGGTGGTTTTACTTGCATATAGTAGTCTTTTTTTTCTCTTTGTGTTCTCAGGCCC
ACATAACTGATACCTGCCGAATTAATGAAACTGAACCTACGTTTAAGATGATTGGTCGTG
CAAGATAATCAATGGTATTATTTAATTAATGCTTGGAAGACATATATTCTTATAAAAACT
CACAACAGTTATTTACAAGCCTAA-CCTATTACAACTATACTTTTTAGTTAAACCCCCCC
--------------------------
>EIxCCBR3
NNNNNNNNNNNNNNNNNNNNNNNNNNNNNNNNNNNNNNNACGCAAAAG-AAGCGCCAACATG
TAAATTTACCTATATTCTCTGCCGTGCCCAACAGAACAATATCCGTAATACCTATCTATG
TATTATTGTACATCAACTTATTTACCACTAGCATATGATCAGTAATGTTGTCGATTAATT
TGGCTTTAAACATAAAAATTTATTAATTTTACATAAACTGTTTTAGTTACATGACTATTA
TACAGGTAATAAGAATGAAATGATATAGGACATAAAATTAAACCATTATTCTCAACCATG
AATATCGTCACAGTAATAGGTTATTTCTTAGTTCAGCTCATCACGAGAAATAAGCAACCC
TTGTTAGTAAGATACAACATTACCAGTTTCAAGCCCATTAAGTCATATCGTACATAACTG
ATCTATTCTGGCCTCTGGTTGTTTTTTCAGGCACATTAAGATAATAAAGTTCACTCGTTC
CTCTTTAAAAGG-------CCTCTGGTTAAATGAGTTCTATACATTAAATTTATAACTTG
GCATACGGTGGTTTTACTTGCATATAGTAGTCTTTTTTTTCTCTTTGTGTTCTCAGGCCC
GCATAACTGATACCTGCCAGATTGATGAGACTGGACCTACGTTCAAAATGATTGGCCGTG
CAGAATATTTAATGGTATTATTTAATTAATGCTTTTAGGACATATATTTTTATAAAAACT
CACAACAGTTATTCACAAGCTAAAACCCATTACAACCATACTTTTTAGTTAAACCCCCCC
ACCCCC--------------------
